# Supplementary material for: Decadal stability in genetic variation and structure in the intertidal seaweed Fucus serratus (Heterokontophyta: Fucaceae)
Source: PubMed Central journal article supplement (PMC6002991; doi:10.1186/s12862-018-1213-2), 2018-06-15

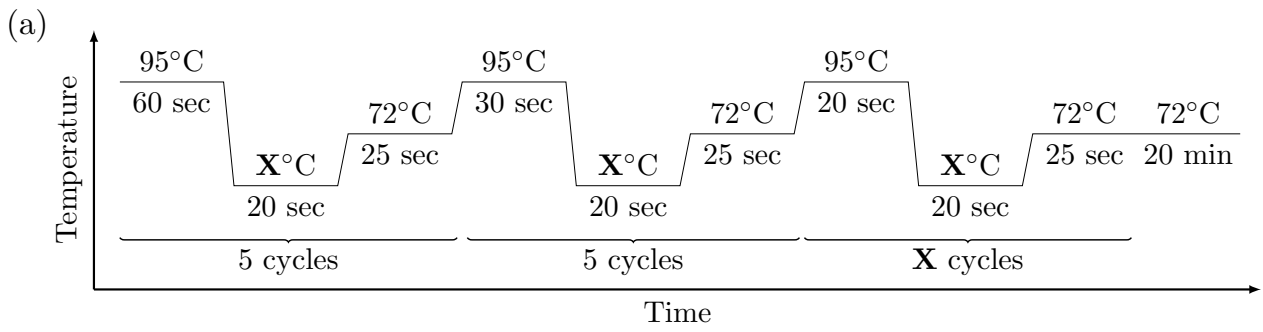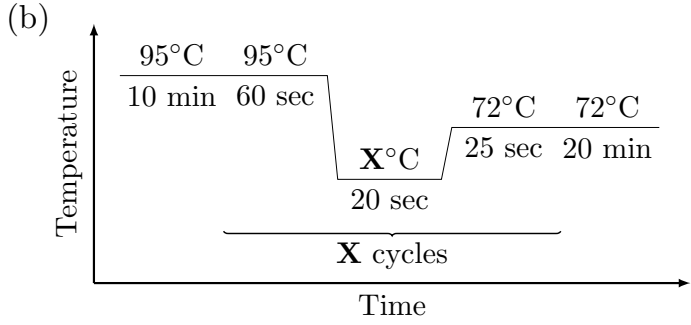

Supplement: 12862_2018_1213_MOESM3_ESM.pdf [file 12862_2018_1213_MOESM3_ESM.pdf]
